# Supplementary material
Source: publisher figshare collection journal article supplement (https://karger.figshare.com/ndownloader/files/27909762)
Supplement: Supplementary file 1 [file 27909762]

**Supplemental Materials**

**Supplemental Table 1**: International Classification of Diseases, 9th and 10th Edition (ICD9, ICD10) codes and Current Procedural Terminology (CPT-4) procedure codes used to identify lower extremity amputation

| Level | ICD-9 | ICD-10 | CPT-4 |
| --- | --- | --- | --- |
| Above knee | 84.16, 84.17, 84.18, 84.19 | 0Y6F0ZZ, 0Y6G0ZZ, 0Y6C0Z1, 0Y6C0Z2, 0Y6C0Z3,0Y6D0Z1, 0Y6D0Z2, 0Y6D0Z3, 0Y670ZZ, 0Y680ZZ, 0Y620ZZ, 0Y630ZZ, 0Y640ZZ | 27295, 27590-92, 27598 |
| Below knee | 84.13, 84.14, 84.15 | 0Y6H0Z3, 0Y6J0Z3, 0Y6H0Z1, 0Y6H0Z2, 0Y6J0Z1, 0Y6J0Z2 | 27880-82, 27888-89 |
| Below ankle | 84.11, 84.12 | 0Y6P0Z0, 0Y6P0Z1, 0Y6P0Z2, 0Y6P0Z3,0Y6Q0Z0,0Y6Q0Z1, 0Y6Q0Z2, 0Y6Q0Z3,0Y6R0Z0, 0Y6R0Z1, 0Y6R0Z2, 0Y6R0Z3, 0Y6S0Z0, 0Y6S0Z1, 0Y6S0Z2, 0Y6S0Z3, 0Y6T0Z0, 0Y6T0Z1, 0Y6T0Z2, 0Y6T0Z3, 0Y6U0Z0, 0Y6U0Z1, 0Y6U0Z2,0Y6U0Z3, 0Y6V0Z0, 0Y6V0Z1, 0Y6V0Z2, 0Y6V0Z3, 0Y6W0Z0, 0Y6W0Z1, 0Y6W0Z2, 0Y6W0Z3,0Y6X0Z0 ,0Y6X0Z1, 0Y6X0Z2, 0Y6X0Z3, 0Y6Y0Z0, 0Y6Y0Z1, 0Y6Y0Z2, 0Y6Y0Z3, 0Y6M0Z4, 0Y6M0Z5,0Y6M0Z6, 0Y6M0Z7, 0Y6M0Z8, 0Y6M0Z9, 0Y6M0ZB,0Y6M0ZC, 0Y6M0ZD, 0Y6M0ZF, 0Y6N0Z4, 0Y6N0Z5,0Y6N0Z6, 0Y6N0Z7, 0Y6N0Z8, 0Y6N0Z9, 0Y6N0ZB,0Y6N0ZC, 0Y6N0ZD, 0Y6N0ZF, 0Y6M0Z0, 0Y6N0Z0, | 28800, 28805 |

**Supplemental Table 2**: International Classification of Diseases, 9th and 10th Edition (ICD9, ICD10) codes and Current Procedural Terminology (CPT-4) procedure codes used to identify lower extremity surgical and endovascular revascularization

|  | ICD-9 | ICD-10 Code | CPT-4 |
| --- | --- | --- | --- |
| Surgical revascularization | 38.08, 38.18, 38.38, 38.48, 39.25 | 04CK0Z6,04CK0ZZ,04CK4Z6,04CK4ZZ,04CL0Z6,04CL0ZZ,04CL4Z6,  04CL4ZZ,04CM0Z6,04CM0ZZ,04CM4Z6,04CM4ZZ,04CN0Z6,04CN0ZZ,  04CN4Z6,04CN4ZZ,04CP0Z6,04CP0ZZ,04CP4Z6, 04CP4ZZ,04CQ0Z6,  04CQ0ZZ,04CQ4Z6,04CQ4ZZ,04CR0Z6,04CR0ZZ,04CR4Z6,04CR4ZZ,  04CS0Z6,04CS0ZZ,04CS4Z6,04CS4ZZ,04CT0Z6, 04CT0ZZ, 04CT4Z6, 04CT4ZZ,04CU0Z6,04CU0ZZ,04CU4Z6, 04CU4ZZ,04CV0Z6, 04CV0ZZ, 04CV4Z6,04CV4ZZ,04CW0Z6, 04CW0ZZ,04CW4Z6,04CW4ZZ, 04CY0Z6,04CY0ZZ,04CY4Z6, 04CY4ZZ, 04HY02Z, 04HY42Z, 04PY0YZ, 04PY3YZ, 04PY4YZ, 04WY0YZ,04WY3YZ,04WY4YZ,  04BK0ZZ,04BK4ZZ,04BL0ZZ, 04BL4ZZ,04BM0ZZ,04BM4ZZ,  04BN0ZZ,04BN4ZZ,04BP0ZZ, 04BP4ZZ,04BQ0ZZ,04BQ4ZZ,04BR0ZZ,  04BR4ZZ,04BS0ZZ, 04BS4ZZ,04BT0ZZ,04BT4ZZ,04BU0ZZ,04BU4ZZ, 04BV0ZZ,04BV4ZZ,04BW0ZZ,04BW4ZZ,04BY0ZZ,04RK07Z,  04RK0JZ,04RK0KZ,04RK47Z,04RK4JZ,04RK4KZ,04RL07Z,04RL0JZ, 04RL0KZ,04RL47Z,04RL4JZ,04RL4KZ,04RM07Z,04RM0JZ, 04RM0KZ, 04RM47Z,04RM4JZ,04RM4KZ,04RN07Z,04RN0JZ, 04RN0KZ, 04RN47Z,04RN4JZ,04RN4KZ,04RP07Z,04RP0JZ, 04RP0KZ, 04RP47Z, 04RP4JZ, 04RP4KZ, 04RQ07Z, 04RQ0JZ, 04RQ0KZ, 04RQ47Z, 04RQ4JZ, 04RQ4KZ, 04RR07Z, 04RR0JZ, 04RR0KZ, 04RR47Z, 04RR4JZ,04RR4KZ,04RS07Z,04RS0JZ,04RS0KZ,04RS47Z,04RS4JZ, 04RS4KZ,04RT07Z,04RT0JZ,04RT0KZ,04RT47Z,04RT4JZ,04RT4KZ, 04RU0JZ,04RU0KZ,04RU47Z,04RU4JZ,04RU4KZ,04RV07Z,04RV0JZ, 04RV0KZ,04RV47Z,04RV4JZ,04RV4KZ,04RW07Z,04RW0JZ, 04RW0KZ,04RW47Z,04RW4JZ,04RW4KZ,04RY07Z,04RY0JZ, 04RY0KZ,04RY47Z,04RY4JZ,04RY4KZ,0410096,0410097,0410098, 0410099,041009B,041009C,041009D,041009F,041009G,041009H, 041009J,041009K,041009Q,041009R,04100A6,04100A7,04100A8, 04100A9,04100AB,04100AC,04100AD,04100AF,04100AG,04100AH, 04100AJ,04100AK,04100AQ,04100AR,04100J6,04100J7,04100J8, 04100J9,04100JB,04100JC,04100JD,04100JF,04100JG,04100JH,04100JJ, 04100JK,04100JQ,04100JR,04100K6,04100K7,04100K8,04100K9, 04100KB,04100KC,04100KD,04100KF,04100KG,04100KH,04100KJ, 04100KK,04100KQ,04100KR,04100Z6,04100Z7,04100Z8,04100Z9, 04100ZB,04100ZC,04100ZD,04100ZF,04100ZG,04100ZH,04100ZJ, 04100ZK,04100ZQ,04100ZR,041C09H,041C09J,041C09K,041C0AH, 041C0AJ,041C0AK,041C0JH,041C0JJ,041C0JK,041C0KH,041C0KJ, 041C09J,041C09K,041C0AH,041C0AJ,041C0AK,041C0JH,041C0JJ, 041C0JK,041C0KH,041C0KJ,041C0KK,041C0ZH,041C0ZJ,041C0ZK, 041C49H,041C49J,041C49K,041C4AH,041C4AJ,041C4AK,041C4JH, 041C4JJ,041C4JK,041C4KH,041C4KJ,041C4KK,041C4ZH,041C4ZJ, 041C4ZK,041D09H,041D09J,041D09K,041D0AH,041D0AJ,041D0AK, 041D0JH,041D0JJ,041D0JK,041D0KH,041D0KJ,041D0KK,041D0ZH, 041D0ZJ,041D0ZK,041D49H,041D49J,041D49K,041D4AH,041D4AJ, 041D4AK,041D4JH,041D4JJ,041D4JK,041D4KH,041D4KJ,041D4KK, 041D4ZH,041D4ZJ,041D4ZK,041E09H,041E09J,041E09K,041E0AH, 041E0AJ,041E0AK,041E0JH,041E0JJ,041E0JK,041E0KH,041E0KJ, 041E0KK,041E0ZH,041E0ZJ,041E0ZK,041E49H,041E49J,041E49K, 041E4AH. 041E4AJ, 041E4AK, 041E4JH, 041E4JJ, 041E4JK, 041E4KH, 041E4KJ,041E4KK,041E4ZH,041E4ZJ,041E4ZK,041F09H,041F09J, 041F09K,041F0AH,041F0AJ,041F0AK,041F0JH,041F0JJ,041F0JK, 041F0KH,041F0KJ,041F0KK,041F0ZH,041F0ZJ,041F0ZK,041F49H, 041F49J, 041F49K, 041F4AH, 041F4AJ, 041F4AK, 041F4JH, 041F4JJ, 041F4JK,041F4KH,041F4KJ,041F4KK,041F4ZH,041F4ZJ,041F4ZK, 041H09H,041H09J,041H09K,041H0AH,041H0AJ,041H0AK,041H0JH, 041H0JJ,041H0JK,041H0KH,041H0KJ,041H0KK,041H0ZH,041H0ZJ, 041H0ZK,041H49H,041H49J,041H49K,041H4AH,041H4AJ,041H4AK, 041H4JH,041H4JJ,041H4JK,041H4KH,041H4KJ,041H4KK,041H4ZH, 041H4ZJ,041H4ZK,041J09H,041J09J,041J09K,041J0AH,041J0AJ, 041J0AK,041J0JH,041J0JJ,041J0JK,041J0KH,041J0KJ,041J0KK, 041J0ZH,041J0ZJ 041J0ZK | 35454, 35456, 35459, 35470, 35473, 35474, 35482, 35483, 35485, 35492, 35493, 35495, 37220, 37221, 37222, 37223, 37224, 37225, 37226, 37227, 37228, 37229, 37230, 37231, 37232, 37233, 37234, 37235 |
| Endovascular revascularization |  | 04CK4Z6,04CK4ZZ,04CL0Z6,04CL0ZZ,04CL4Z6,04CL4ZZ,04CM0Z6, 04CM0ZZ,04CM4Z6,04CM4ZZ,04CN0Z6,04CN0ZZ,04CN4Z6,04CN4ZZ,  04CP0Z6,04CP0ZZ,04CP4Z6,04CP4ZZ,04CQ0Z6,04CQ0ZZ,04CQ4Z6 04CQ4ZZ,04CR0Z ,04CR0ZZ,04CR4Z6, 04CR4ZZ,04CS0Z6,04CS0ZZ, 04CS4Z6,04CS4ZZ,04CT0Z6, 04CT0ZZ, 04CT4Z6, 04CT4ZZ, 04CU0Z6, 04CU0ZZ,04CU4Z6,04CU4ZZ,04CV0Z6,04CV0ZZ,04CV4Z6,04CV4ZZ, 04CW0Z6,04CW0ZZ,04CW4Z6,04CW4ZZ,04CY0Z6,04CY0ZZ, 04CY4Z6,04CY4ZZ,04HY02Z,04HY42Z,04PY0YZ,04PY3YZ,04PY4YZ, 04WY0YZ,04WY3YZ,04WY4YZ,04BK0ZZ,04BK4ZZ,04BL0ZZ, 04BL4ZZ,04BM0ZZ,04BM4ZZ,04BN0ZZ,04BN4ZZ,04BP0ZZ, 04BP4ZZ, 04BQ0ZZ,04BQ4ZZ,04BR0ZZ,04BR4ZZ,04BS0ZZ,04BS4ZZ,04BT0ZZ, 04BT4ZZ,04BU0ZZ,04BU4ZZ,04BV0ZZ,04BV4ZZ,04BW0ZZ, 04BW4ZZ,04BY0ZZ,04BY4ZZ,04RK47Z,04RK4JZ,04RK4KZ, 04RL07Z, 04RL0JZ,04RL0KZ,04RL47Z,04RL4JZ,04RL4KZ,04RM07Z,04RM0JZ, 04RM0KZ,04RM47Z,04RM4JZ,04RM4KZ,04RN07Z,04RN0JZ, 04RN0KZ,04RN47Z,04RN4JZ,04RN4KZ,04RP07Z,04RP0JZ,04RP0KZ, 04RP47Z,04RP4JZ,04RP4KZ,04RQ07Z,04RQ0JZ,04RQ0KZ,04RQ47Z, 04RQ4JZ,04RQ4KZ,04RR07Z,04RR0JZ,04RR0KZ,04RR47Z,04RR4JZ, 04RR4KZ,04RS07Z,04RS0JZ,04RS0KZ,04RS47Z,04RS4JZ,04RS4KZ, 04RT07Z,04RT0JZ,04RT0KZ,04RT47Z,04RT4JZ,04RT4KZ,04RU0JZ, 04RU0KZ,04RU47Z,04RU4JZ,04RU4KZ,04RV07Z,04RV0JZ,04RV0KZ, 04RV47Z,04RV4JZ,04RV4KZ,04RW07Z,04RW0JZ,04RW0KZ, 04RW47Z,04RW4JZ,04RW4KZ,04RY07Z,04RY0JZ,04RY0KZ, 04RY47Z,04RY4JZ,04RY4KZ,0410096,0410097,0410098,0410099, 041009B,041009C,041009D,041009F,041009G,041009H,041009J, 041009K,041009Q,041009R,04100A6,04100A7,04100A8,04100A9, 04100AB,04100AC,04100AD,04100AF,04100AG,04100AH,04100AJ, 04100AK,04100AQ,04100AR,04100J6,04100J7,04100J8,04100J9, 04100JB,04100JC,04100JD,04100JF,04100JG,04100JH,04100JJ,04100JK, 04100JQ,04100JR,04100K6,04100K7,04100K8,04100K9,04100KB, 04100KC,04100KD,04100KF,04100KG,04100KH,04100KJ,04100KK, 04100KQ,04100KR,04100Z6,04100Z7,04100Z8,04100Z9,04100ZB, 04100ZC,04100ZD,04100ZF,04100ZG,04100ZH,04100ZJ,04100ZK, 04100ZQ, 04100ZR, 0410496, 0410497, 0410498, 0410499, 041049B, 041049C,041049D,041049F,041049G,041049H,041049J,041049K, 041049Q,041049R,04104A6,04104A7,04104A8,04104A9,04104AB, 04104AC,04104AD,04104AF,04104AG,04104AH,04104AJ,04104AK, 04104AQ,04104AR,04104J6,04104J7,04104J8,04104J9,04104JB, 04104JC,04104JD,04104JF,04104JG,04104JH,04104JJ,04104JK,04104JQ, 04104JR,04104K6,04104K7,04104K8,04104K9,04104KB,04104KC, 04104KD,04104KF,04104KG,04104KH,04104KJ,04104KK,04104KQ, 04104KR,04104Z6,04104Z7,04104Z8,04104Z9,04104ZB,04104ZC, 04104ZD, 04104ZF, 04104ZG, 04104ZH, 04104ZJ, 04104ZK, 04104ZQ, 04104ZR,041C09H,041C09J,041C09K,041C0AH,041C0AJ,041C0AK, 041C0JH,041C0JJ,041C0JK,041C0KH,041C0KJ,041C0KK,041C0ZH, 041C0ZJ,041C0ZK,041C49H,041C49J,041C49K,041C4AH,041C4AJ, 041C4AK,041C4JH,041C4JJ,041C4JK,041C4KH,041C4KJ,041C4KK, 041C4ZH,041C4ZJ,041C4ZK,041D09H,041D09J,041D09K,041D0AH, 041D0AJ,041D0AK,041D0JH,041D0JJ,041D0JK,041D0KH,041D0KJ, 041D0KK,041D0ZH,041D0ZJ,041D0ZK,041D49H,041D49J,041D49K, 041D4AH,041D4AJ,041D4AK,041D4JH,041D4JJ,041D4JK,041D4KH, 041D4KJ,041D4KK,041D4ZH,041D4ZJ,041D4ZK,041E09H,041E09J, 041E09K,041E0AH,041E0AJ,041E0AK,041E0JH,041E0JJ,041E0JK, 041E0KH,041E0KJ,041E0KK,041E0ZH,041E0ZJ,041E0ZK,041E49H, 041E49J,041E49K,041E4AH,041E4AJ,041E4AK,041E4JH,041E4JJ, 041E4JK,041E4KH,041E4KJ,041E4KK,041E4ZH,041E4ZJ,041E4ZK, 041F09H,041F09J,041F09K,041F0AH,041F0AJ,041F0AK,041F0JH, 041F0JJ,041F0JK,041F0KH,041F0KJ,041F0KK,041F0ZH,041F0ZJ, 041F0ZK, 041F49H, 041F49J, 041F49K, 041F4AH, 041F4AJ, 041F4AK, 041F4JH,041F4JJ,041F4JK,041F4KH,041F4KJ,041F4KK,041F4ZH, 041F4ZJ, 041F4ZK, 041H09H, 041H09J, 041H09K, 041H0AH, 041H0AJ, 041H0AK,041H0JH,041H0JJ,041H0JK,041H0KH,041H0KJ,041H0KK, 041H0ZH, 041H0ZJ, 041H0ZK, 041H49H, 041H49J, 041H49K, 041H4AH, 041H4AJ,041H4AK,041H4JH,041H4JJ,041H4JK,041H4KH,041H4KJ, 041H4KK,041H4ZH,041H4ZJ,041H4ZK,041J09H,041J09J,041J09K, 041J0AH, 041J0AJ, 041J0AK, 041J0JH, 041J0JJ, 041J0JK, 041J0KH, 041J0KJ,041J0KK,041J0ZH,041J0ZJ,041J0ZK,041J49H,041J49J, 041J49K,041J4AH,041J4AJ,041J4AK,041J4JH,041J4JJ,041J4JK, 041J4KH,041J4KJ,041J4KK,041J4ZH,041J4ZJ,041J4ZK | 35454, 35456, 35459, 35470, 35473, 35474, 35482, 35483, 35485, 35492, 35493, 35495, 37220, 37221, 37222, 37223, 37224, 37225, 37226, 37227, 37228, 37229, 37230, 37231, 37232, 37233, 37234, 37235 |

**Supplemental Figure 1:** Study cohort flow diagram


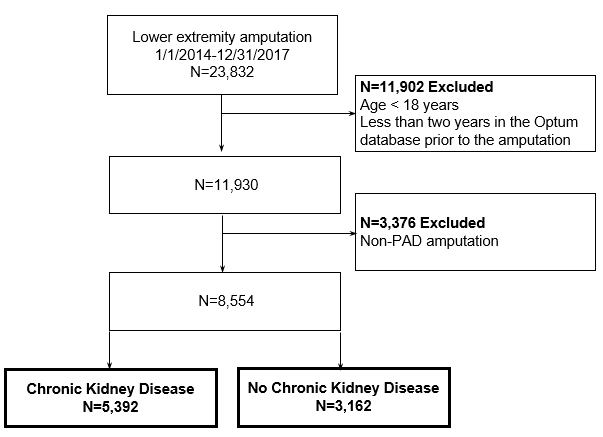


**Supplemental Figure 2**: Association of chronic kidney disease versus no chronic kidney disease and the odds of having A) diagnostic evaluation; B) specialty care; C) revascularization in the 1-year prior to lower extremity amputation across levels of age (in years). We found no evidence that age modified the associations.


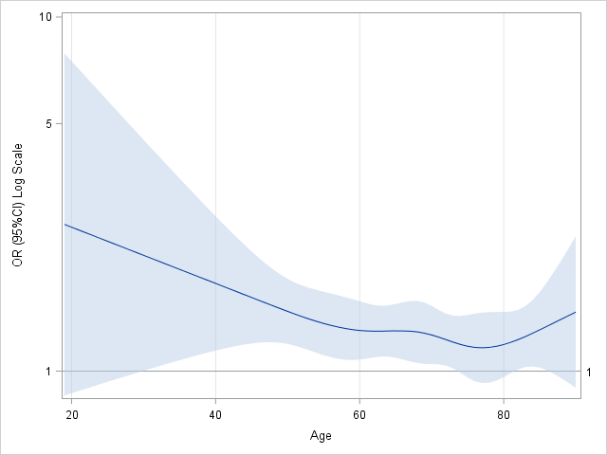


**A**

P-value interaction =0.6


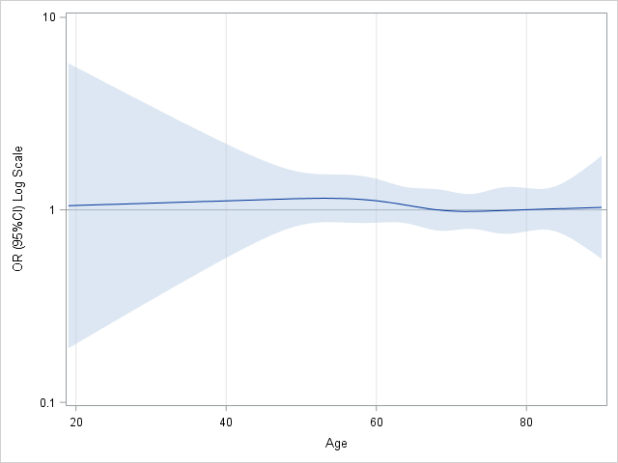


P-value interaction >0.9

**C**


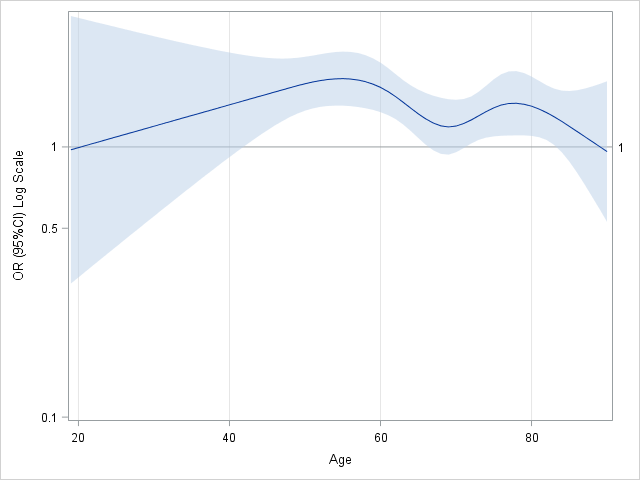


**B**

P-value interaction =0.2
